# Supplementary material for: Effect of Tocilizumab in Hospitalized Patients with Severe COVID-19 Pneumonia: A Case-Control Cohort Study
Source: MDPI journal article supplement (doi:10.3390/ph13100317), 2020-10-17
Supplement: s1 [file s1]

# Supplementary Material

For “Effect of tocilizumab in hospitalized patients with severe pneumonia COVID-19: a cohort study” by Benjamin Rossi\* & Lee S Nguyen\* et al.

## Supplementary figure. Flow chart

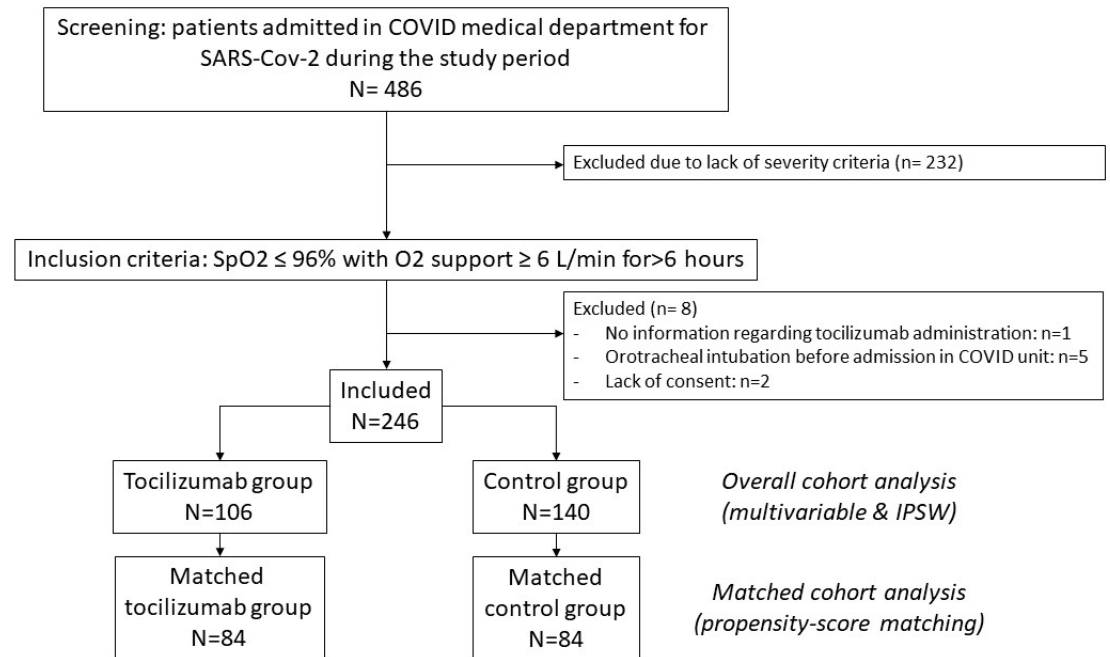

**Supplementary Table. Baseline characteristics in the overall cohort and corresponding available data**

| <b>Clinical features, No (%)</b>                                                    |             |     |
|-------------------------------------------------------------------------------------|-------------|-----|
| Tocilizumab                                                                         | 106 (43.1%) | all |
| Age, mean±SD, years                                                                 | 68.0 ±15.0  | all |
| Female                                                                              | 95 (38.6%)  | all |
| Full engagement status                                                              | 145 (58.9%) | all |
| Diabetes                                                                            | 101 (41.1%) | all |
| Insulin treatment                                                                   | 40 (16.3%)  | all |
| Hypertension                                                                        | 143 (58.1%) | all |
| ACEI treatment                                                                      | 37 (15.0%)  | all |
| ARB treatment                                                                       | 50 (20.3%)  | all |
| Smoker (active or past)                                                             | 62 (25.2%)  | all |
| History of cardiovascular disease, stroke, peripheral artery disease, heart failure | 68 (27.6%)  | all |
| Stroke                                                                              | 26 (10.6%)  | all |
| Peripheral artery disease                                                           | 8 (3.3%)    | all |
| Heart failure                                                                       | 11 (4.5%)   | all |
| Atrial fibrillation                                                                 | 30 (12.2%)  | all |
| History_COPD_asthma_emphysema_fibrosis                                              | 39 (15.9%)  | all |
| COPD                                                                                | 18 (7.3%)   | all |
| Asthma                                                                              | 15 (6.1%)   | all |
| Emphysema                                                                           | 11 (4.5%)   | all |
| Fibrosis                                                                            | 3 (1.2%)    | all |
| Chronic kidney disease (eGFR<60 ml/min/1.73m <sup>2</sup> )                         | 41 (16.7%)  | all |
| Solid organ transplantation                                                         | 3 (1.2%)    | all |
| Cirrhosis                                                                           | 0 (0.0%)    | all |
| HIV                                                                                 | 2 (0.8%)    | all |
| Immunosuppressant drugs                                                             | 17 (6.9%)   | all |
| Long-term oral corticosteroids                                                      | 18 (7.3%)   | all |
| Malignancy (active)                                                                 | 23 (9.3%)   | all |
| Obesity (BMI>30kg/m <sup>2</sup> )                                                  | 74 (30.1%)  | all |
| <b>Treatments after admission</b>                                                   |             |     |
| No.(%) under antibiotics                                                            | 240 (97.6%) | all |
| Betalactamin                                                                        | 234 (95.1%) | all |
| Macrolide                                                                           | 191 (77.6%) | all |
| Others                                                                              | 28 (11.4%)  | all |
| No.(%) under antiviral therapy                                                      | 194 (78.9%) | all |
| Hydroxychloroquine                                                                  | 188 (76.4%) | all |
| Lopinavir/ritonavir                                                                 | 9 (3.7%)    | all |
| Immunosuppressants and/or corticosteroids after admission                           | 90 (36.6%)  | all |
| Baricitinib                                                                         | 19 (7.7%)   | all |

| <b>Characteristics at admission</b>                                         |                     |                 |
|-----------------------------------------------------------------------------|---------------------|-----------------|
| SpO <sub>2</sub> , mean $\pm$ SD, %                                         | 94.0 $\pm$ 4.0      | all             |
| SpO <sub>2</sub> /FiO <sub>2</sub> ratio, mean $\pm$ SD,                    | 332.1 $\pm$ 100.5   | all             |
| Oxygen flow, mean $\pm$ SD, L/min                                           | 4.0 $\pm$ 4.0       | all             |
| PaO <sub>2</sub> , mean $\pm$ SD, mmHg                                      | 70.0 $\pm$ 22.0     | 209/246 (85.0%) |
| Temperature, mean $\pm$ SD, °C                                              | 37.3 $\pm$ 1.1      | all             |
| C-reactive protein, mean $\pm$ SD, mg/L                                     | 133.0 $\pm$ 94.0    | all             |
| Lymphocyte count, mean $\pm$ SD, mCL                                        | 1339.5 $\pm$ 2543.4 | all             |
| Delay between first symptoms and admission, means $\pm$ SD, days            | 5.0 $\pm$ 12.0      | all             |
| <b>Characteristics at inclusion</b>                                         |                     |                 |
| Delay between first symptoms and inclusion, mean $\pm$ SD, days             | 8.0 $\pm$ 4.0       | all             |
| Delay between admission and inclusion, mean $\pm$ SD, days                  | 3.0 $\pm$ 11.0      | all             |
| SpO <sub>2</sub> , mean $\pm$ SD, %                                         | 94.0 $\pm$ 4.0      | all             |
| O <sub>2</sub> flow support, mean $\pm$ SD, l/min                           | 9.0 $\pm$ 4.0       | all             |
| Systolic blood pressure, mean $\pm$ SD, mmHg                                | 131.0 $\pm$ 20.0    | all             |
| C-reactive protein, mean $\pm$ SD, mg/L                                     | 154.7 $\pm$ 98.4    | all             |
| Temperature, mean $\pm$ SD, °C                                              | 37.3 $\pm$ 1.2      | all             |
| Lymphocyte count, mean $\pm$ SD, mCL                                        | 1182.8 $\pm$ 1850.9 | all             |
| eGFR, mean $\pm$ SD, ml/min/1.73m <sup>2</sup>                              | 106.9 $\pm$ 461.9   | all             |
| SpO <sub>2</sub> /FiO <sub>2</sub> ratio, mean $\pm$ SD,                    | 207.1 $\pm$ 45.7    | all             |
| Lymphocyte count, mean $\pm$ SD, mCL                                        | 1339.5 $\pm$ 2580.5 | 239/246 (97.2%) |
| SpO <sub>2</sub> , mean $\pm$ SD, %                                         | 95.0 $\pm$ 3.0      | 163/246 (66.3%) |
| Delay between inclusion and tocilizumab                                     | 1.0 $\pm$ 1.0       | 106/106 (all)   |
| PaO <sub>2</sub> , mean $\pm$ SD, mmHg                                      | 75.0 $\pm$ 25.0     | 186/246 (75.6%) |
| C-reactive protein, mean $\pm$ SD, mg/L                                     | 155.0 $\pm$ 99.0    | all             |
| Use of non-invasive ventilation or high flow oxygenotherapy after inclusion | 13 (5.3%)           | all             |

Data are presented as number (percentage), unless otherwise noted.

Abbreviations: O<sub>2</sub>: oxygen; ACEI: angiotensin conversion enzyme inhibitor; ARB: angiotensin II receptor blocker; BMI: body-mass index; eGFR: estimated glomerular filtration rate by modification of diet in renal disease (MDRD) formula; FiO<sub>2</sub>: fraction of inspired oxygen; HIV: human immunodeficiency virus; IQR: interquartile range; SpO<sub>2</sub>: pulse oximetry O<sub>2</sub> saturation

## Sensitivity analyses

Cox multivariable models in the dataset of 204 patients (which excluded patients who presented the outcome during the first 48 hours after inclusion).

| Primary outcome                                                | Adj.HR | 95CI      | p-value |
|----------------------------------------------------------------|--------|-----------|---------|
| Tocilizumab                                                    | 0.402  | 0.40-0.23 | 0.001   |
| Full engagement status                                         | 0.985  | 0.98-0.98 | <0.001  |
| SpO <sub>2</sub> /FiO <sub>2</sub> ratio (per 1-unit increase) | 0.398  | 0.40-0.23 | 0.001   |

| Death outcome                                                  | Adj.HR | 95CI      | p-value |
|----------------------------------------------------------------|--------|-----------|---------|
| Tocilizumab                                                    | 0.356  | 0.18-0.70 | 0.003   |
| Full engagement status                                         | 0.030  | 0.01-0.12 | <0.001  |
| SpO <sub>2</sub> /FiO <sub>2</sub> ratio (per 1-unit increase) | 0.985  | 0.98-0.99 | <0.001  |
